# Supplementary material
Source: PubMed Central journal article supplement (PMC4959233)

Figure S1. Schematic representation of the membrane topology of synthases predicted from *M. agalactiae*, *M. mycoides* subsp. *mycoides*, *M. capricolum* subsp. *capripneumoniae* and *M. mycoides* subsp. *capri*. Strains and locus tags are indicated. The DxD motif is shown in red and the Q/RXXRW-like motif in blue.

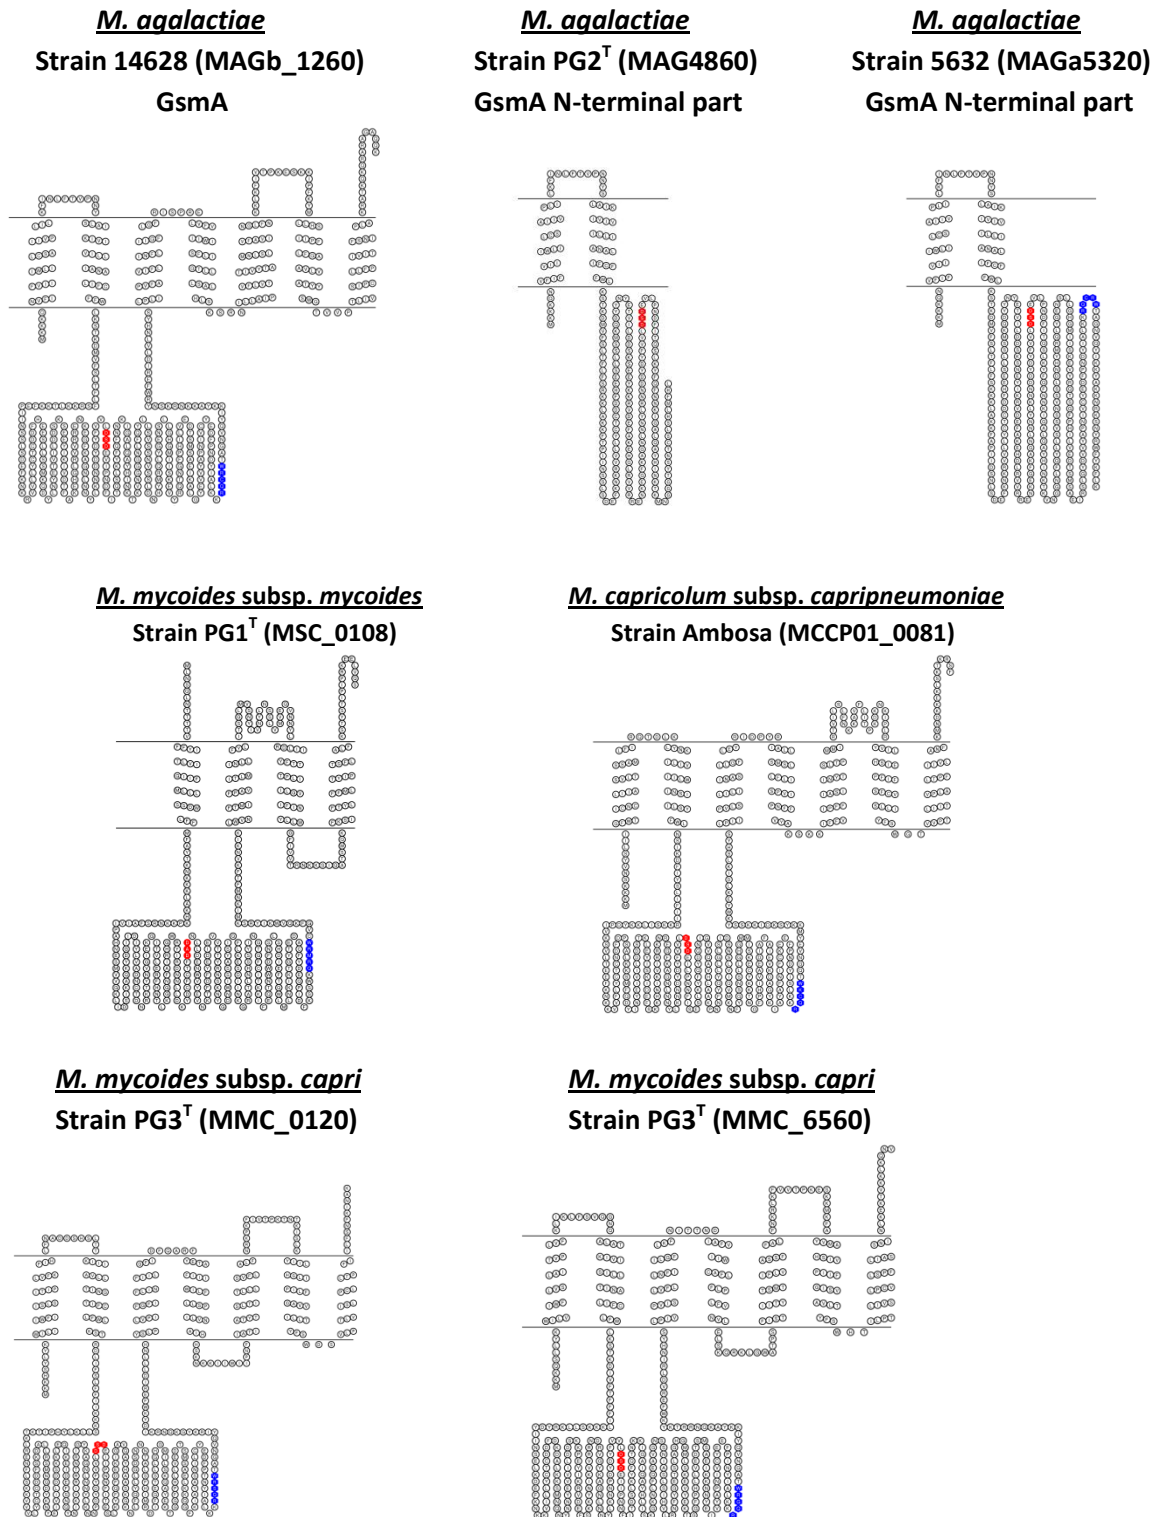

**Figure S2. Colony immunostaining of *M. agalactiae* strains and transformants with mmc4 serum.** Mmc4-positive colonies are dark-blue and mmc4-negative colonies are pink. Examples of negative or sectored colonies are marked with a red arrow. Numbers of nucleotides in the polyG tract of the wild-type *gsmA* gene are indicated in brackets. <sup>1</sup> *gsmA* is disrupted by an IS or by a single base deletion upstream of the polyG, in strain 5632 and 4867, respectively.

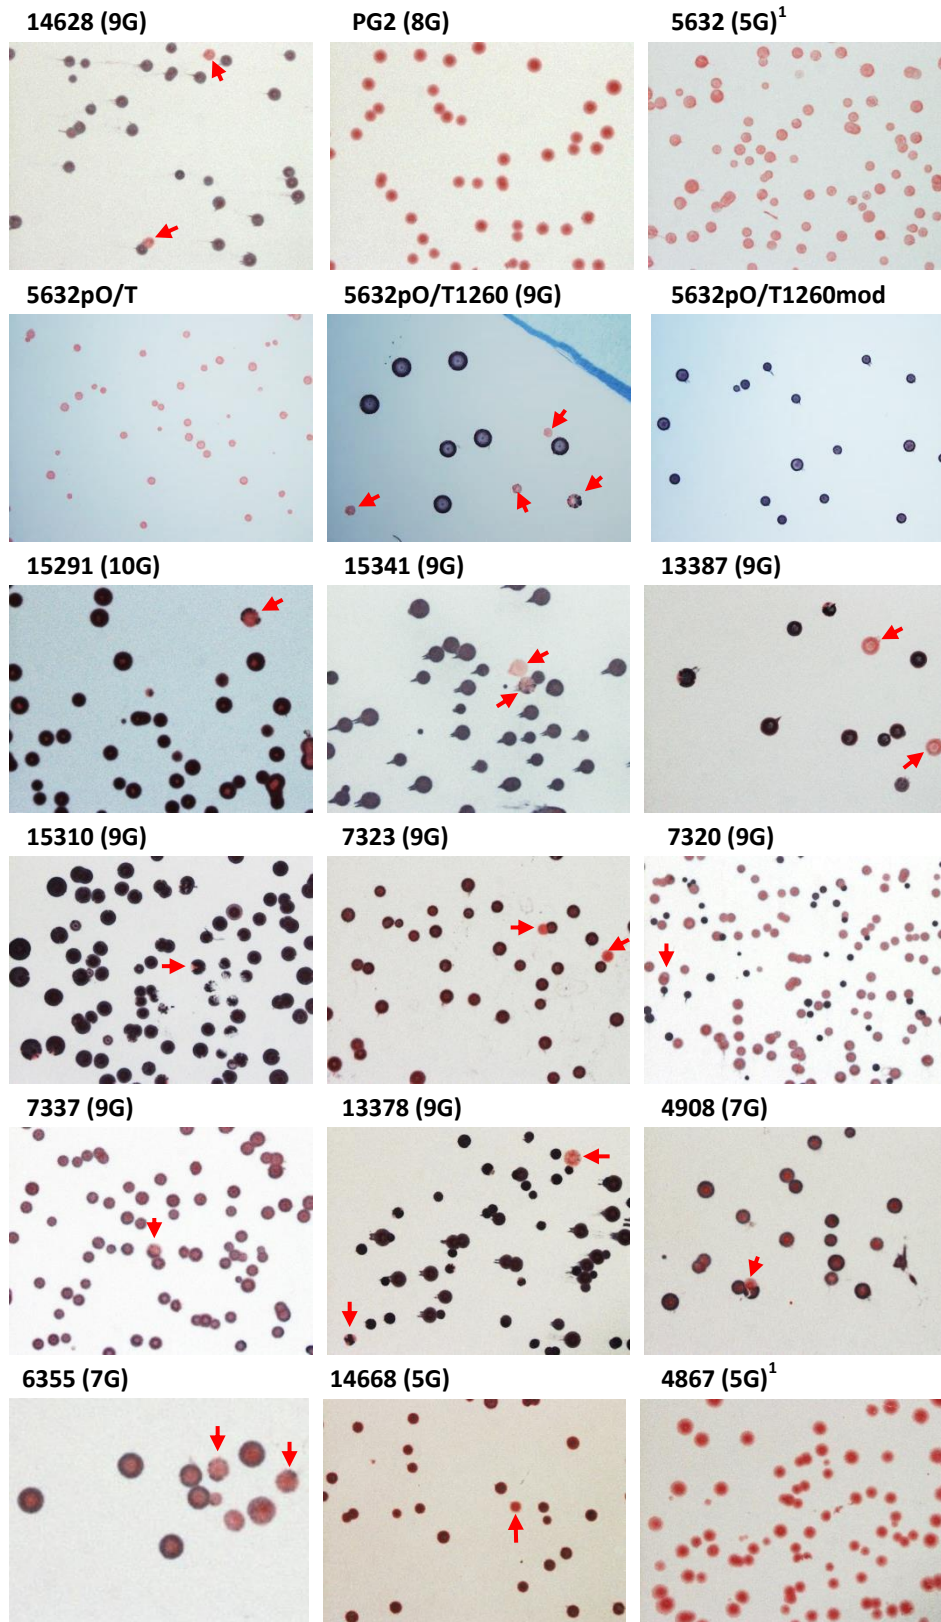

Table S1. Non-exhaustive list of mycoplasma species harboring genes coding for synthases and enzymes involved in sugar activation.

| Phylogenetic group | Mycoplasma                                           |                   |                         |           | UDP-glucose synthesis                   | UDP-galactopyranose synthesis |               |                                      | UDP-galactofuranose synthesis  | UDP-sugar synthesis prediction |          |          | Synthase <sup>1</sup>          |        |            |                | Secreted polysaccharide |
|--------------------|------------------------------------------------------|-------------------|-------------------------|-----------|-----------------------------------------|-------------------------------|---------------|--------------------------------------|--------------------------------|--------------------------------|----------|----------|--------------------------------|--------|------------|----------------|-------------------------|
|                    | species                                              | strains           | genome accession number | host      | UTP glucose-1P uridylyltransferase GalU | UDP-glucose 4 epimerase GalE  | galactokinase | UTP galactose-1P uridylyltransferase | UDP-galactopyranose mutase Gif | UDP-glc                        | UDP-galp | UDP-galf | mnemonic or accession number   | TMD    | motifs     |                |                         |
| Spiroplasma        | <i>M. mycoides</i> subsp. <i>mycoides</i>            | PG1 <sup>T</sup>  | BX293980.2              | cattle    | MSC_0110                                | MSC_0971<br>MSC_0978          | ND            | ND                                   | MSC_0984<br>MSC_0970           | yes                            | yes      | yes      | MSC_0108                       | 4      | DXD        | QXXRW          | β-(1→6)-galactofuranose |
|                    | <i>M. mycoides</i> subsp. <i>capri</i> serovar LC    | 95010             | FQ377874.1              | goat      | MLC_1070<br>MLC_8170                    | MLC_8200                      | ND            | ND                                   | MLC_8210                       | yes                            | yes      | yes      | MLC_1040<br>MLC_8190           | 4<br>4 | DXD<br>DXD | QXXRW<br>QXXRW | β-(1→6)-galactofuranose |
|                    | <i>M. mycoides</i> subsp. <i>capri</i> serovar capri | PG3 <sup>T</sup>  | JFAE00000000.1          | goat      | MMC_6550                                | ND                            | ND            | ND                                   | ND                             | yes                            | no       | no       | MMC_0120<br>MMC_06560          | 7<br>7 | DXD<br>DXD | RXXRW<br>RXXRW | β-(1→6)-glucan          |
|                    | <i>M. leachii</i>                                    | PG50 <sup>T</sup> | CP002108.1              | cattle    | MSB_A0105                               | ND                            | ND            | ND                                   | ND                             | yes                            | no       | no       | MSB_A0104                      | 7      | DXD        | RXXKW          | β-(1→2)-glucan          |
|                    | <i>M. capricolum</i> subsp. <i>capricolum</i>        | ATCC 27343        | CP000123.1              | goat      | MCA0064                                 | ND                            | ND            | ND                                   | ND                             | yes                            | no       | no       | MCA0063                        | 7      | DXD        | RXXKW          | β-(1→2)-glucan          |
|                    | <i>M. capricolum</i> subsp. <i>capripneumoniae</i>   | Ambosa            | LM995445.1              | goat      | MCCP01_0082                             | ND                            | ND            | ND                                   | ND                             | yes                            | no       | no       | MCCP01_0081                    | 7      | DXD        | RXXKW          | β-(1→2)-glucan          |
| Hominis            | <i>M. bovigenitalium</i>                             | CL-51080          | AORH00000000.1          | cattle    | Mbvg_s01_3210                           | Mbvg_s01_2500                 | ND            | ND                                   | Mbvg_s01_2490                  | yes                            | yes      | yes      | Mbvg_s01_6580<br>Mbvg_S01_6980 | 4<br>7 | DXD<br>DXD | QXXRW<br>RXXKF | Not done                |
|                    | <i>M. agalactiae</i>                                 | 14628             | AJPR00000000.1          | goat      | MAGb_0980                               | ND                            | ND            | ND                                   | ND                             | yes                            | no       | no       | MAGb_1260                      | 7      | DXD        | RXXRW          | β-(1→6)-glucan          |
|                    | <i>M. bovis</i>                                      | PG45 <sup>T</sup> | CP002188.1              | cattle    | MBOVPG45_0358                           | ND                            | ND            | ND                                   | ND                             | yes                            | no       | no       | MBOVPG45_0329                  | 7      | DXD        | RXXRW          | Not done                |
|                    | <i>M. gallinarum</i>                                 | DSM 19816         | JHZE00000000.1          | galliform | WP_027333022.1                          | ND                            | ND            | ND                                   | ND                             | yes                            | no       | no       | WP_027332911.1                 | 4      | DXD        | QXXRW          | Not done                |
|                    | <i>M. alligatoris</i>                                | A21JP2            | ADNC00000000.1          | alligator | WP_005683645.1                          | WP_005683604.1                | ND            | ND                                   | WP_005683646.1                 | yes                            | yes      | yes      | EFF41433.1                     | 4      | DXD        | QXXRW          | Not done                |
|                    | <i>M. fermentans</i>                                 | JER               | CP001995.1              | human     | MFE_05250                               | MFE_00490                     | ND            | ND                                   | ND                             | yes                            | yes      | no       | MFE_00520                      | 4      | DXD        | QXXRW          | Not done                |
| Pneumoniae         | <i>M. penetrans</i>                                  | HF-2              | BA000026.2              | human     | MYPE160                                 | ND                            | ND            | ND                                   | ND                             | yes                            | no       | no       | MYPE6340                       | 7      | DXD        | RXXRW          | Not done                |
|                    | <i>M. iowae</i>                                      | 695               | AGFP00000000.1          | turkey    | GUU_02277<br>GUU_04379                  | GUU_04409                     | GUU_04404     | GUU_04399                            | ND                             | yes                            | yes      | no       | GUU_02272<br>GUU_00732         | 7<br>7 | DXD<br>DXD | RXXRW<br>RXXRI | Not done                |

<sup>1</sup>Specific identification of synthases is based on the secondary structure predicted by TMHMM 2.0 and similarity with other known synthases using Phyre. Glc, glucose; galp, galactopyranose; galf, galactofuranose; TMDs, transmembrane domains; UDP-glc, UDP-glucose; UDP-galp, UDP-galactopyranose; UDP-galf, UDP-galactofuranose. UDP-sugar synthesis prediction is based on the detection of the corresponding enzymes by BLASTP. ND, homologues were not detected by BLASTP searches.

Figure S3. Phylogenetic analysis of Gsm (Glycan synthase of mollicutes) proteins.

The tree was generated using the maximum likelihood method (bootstrap values are indicated in red at nodes). Synthases with 4 transmembrane domains are in the grey box and those with 7 transmembrane domains are in the blue box.

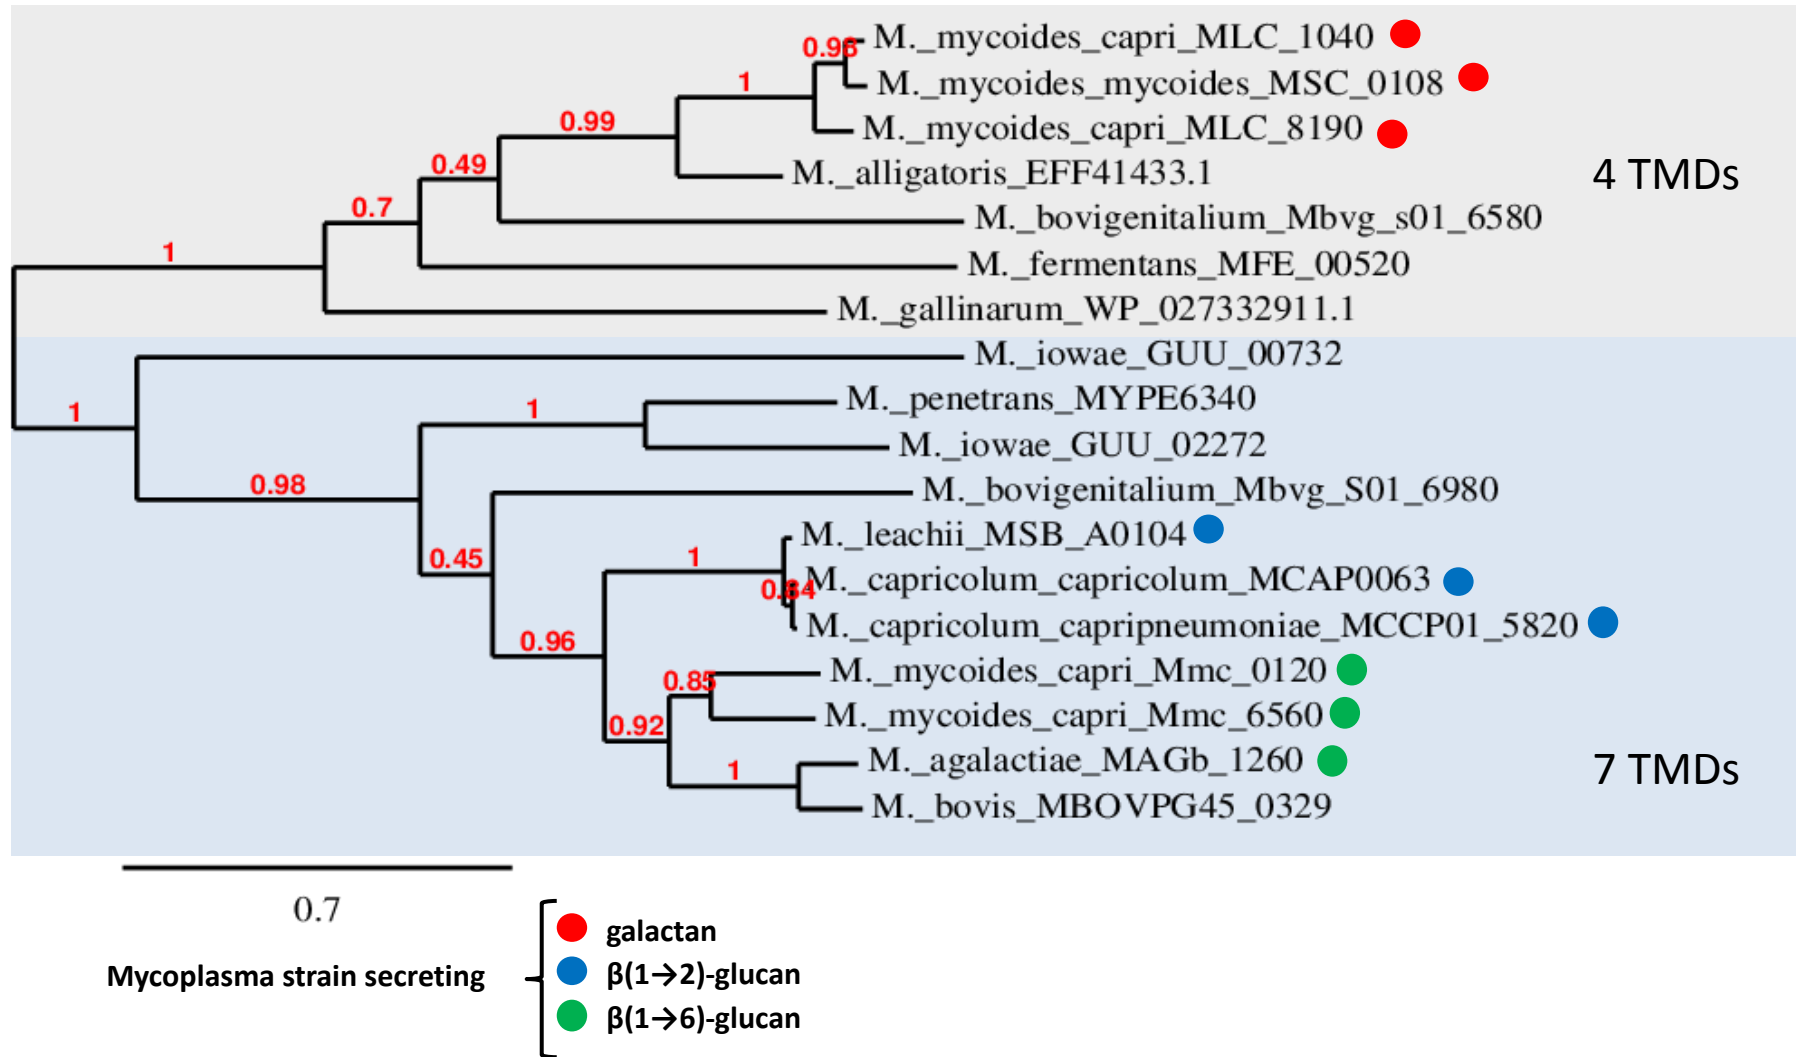

Supplement: AEM.00274-16_zam999117171so1.pdf [file AEM.00274-16_zam999117171so1.pdf]
